# Supplementary material
Source: PubMed Central journal article supplement (PMC7387420)
Supplement: 63_2020_708_MOESM1_ESM.pdf [file 63_2020_708_MOESM1_ESM.pdf]

# Abb. 1 Dokumentationshilfe zur Priorisierung bei Ressourcenknappheit

Patientenetikett

Teammitglieder (Name/Funktion)

Klinische Ethik beteiligt?

ja  /nein

Datum/Uhrzeit

Notwendigkeit einer intensivmedizinischen Therapie

## Evaluation klinischer Erfolgsaussichten einer intensivmedizinischen Therapie

Aktuelle Erkrankung

Allg. präorbider Gesundheitsstatus

Prognosescore<sup>1)</sup>

Allgemeinzustandsscore<sup>2)</sup>

SCORE

PKT.

SCORE

PKT.

jeweils nach Klinikstandard; 1) z.B. SOFA, APACHE II oder CRB-65; 2) z.B. Clinical Frailty Scale CFS oder ECOG

Komorbidität

Patientenwille

in Schwere oder Kombination die Überlebenswahrscheinlichkeit einer Intensivtherapie verringernd

- schwere Organ-Dysfunktion
  - Herz
  - Lunge
  - Leber
  - Niere
- weit fortgeschrittene neurologische Erkrankung
- weit fortgeschrittene Krebserkrankung
- schwere und irreversible Immunschwäche
- Multimorbidität

Kommentar:

Im Gespräch mit Patient (aktueller Wille)

Patientenverfügung vorliegend? ja  /nein

Vorsorgevollmacht vorliegend? ja  /nein

*Gespräch mit*

Betreuer  Vorsorge-Bevollmächtigtem:

Angehörigen (wenn noch kein gesetzlicher Vertreter benannt ist)

Keine Einwilligung in Intensivtherapie

Einwilligung in die Intensivtherapie

Patientenwille nicht ermittelbar

## TRIAGE-Ergebnis

Intensivmedizinische Therapie

Keine intensivmedizinische Therapie

Intensivstation  Intermediate Care

Normalstation  Palliativstation

## RE-EVALUATION am Datum/Uhrzeit:

Einschätzung des klinischen Verlaufs:

Fortsetzung oder Therapiezieländerung, weil:
