# Supplementary material
Source: PubMed Central journal article supplement (PMC7387420)
Supplement: 63_2020_708_MOESM2_ESM.pdf [file 63_2020_708_MOESM2_ESM.pdf]

**Abb. 2 Entscheidungsfindung bei nicht ausreichenden Intensiv-Ressourcen**

**Interprofessionelles Mehr-Augen-Prinzip**

möglichst 2 intensivmedizinisch erfahrenen Ärzte, inkl. Primär- und Sekundärbehandler + möglichst Vertreter der Pflege und bei Bedarf weitere Disziplinen (z.B. Klinische Ethik)

**Schritt 1:**

Besteht intensivmedizinische Behandlungsnotwendigkeit?

**NEIN**

**JA**

**Schritt 2:**

Besteht eine realistische klinische Erfolgsaussicht einer Intensivtherapie zum aktuellen Zeitpunkt?

**NEIN**

**JA**

**Schritt 3:**

Liegt die **Einwilligung** des Patienten vor (aktuell, vorausverfügt, zuvor mündlich geäußert oder mutmaßlich)?

**NEIN**

**JA (oder Patientenwille nicht ermittelbar)**

**Schritt 4: Priorisierung im Mehr-Augen-Prinzip nach Prüfung von Kriterien für den Therapieerfolg und der Ressourcen**

**Kriterien für geringe Erfolgsaussicht bei Initial- oder Re-Evaluation**

Aktuelle Erkrankung

**Höherer Schweregrad**

z.B. akutes Lungenversagen (ARDS, Acute Respiratory Distress Syndrome)

**Begleitende akute Organversagen**

z.B. anhand des SOFA-Scores ermittelt

Ggf. prognostischer Marker für COVID-19-Patienten

Komorbiditäten

**Vorhandensein schwerer Komorbiditäten, wenn diese in ihrer Schwere oder Kombination die Überlebenschance bei einer Intensivtherapie erheblich verringern, z.B.:**

- Schwere Organ-Dysfunktion
- weit fortgeschrittene neurologische Erkrankung
- weit fortgeschrittene Krebserkrankung
- schwere, irreversible Immunschwäche
- Multimorbidität

Allgemeiner Gesundheitsstatus

**Erhöhte Gebrechlichkeit** (z.B. Clinical Frailty Scale [CFS])

**Intensivmedizinische Therapie**

(Intensivstation oder Intermediate Care Unit)

**Nicht-intensivmedizinische Therapie**

(z.B. Allgemeinstation)

Palliativmedizinische Behandlung muss immer gewährleistet sein

**Re-Evaluation Intensivtherapie** in angemessenen Abständen und in **jedem Falle** bei

- klinisch relevanten Veränderungen der klinischen Erfolgsaussicht sowie
- Änderungen des Verhältnisses von Bedarf und zur Verfügung stehenden Ressourcen

**Voraussetzungen für die Beendigung einer Intensivtherapie bei Re-Evaluation**

- Fortsetzung der Intensivtherapie widerspricht dem (erklärten oder mutmaßlichen) Patientenwillen
- Therapieziel ist nicht mehr realistisch erreichbar
- Behandlungsversuch ist nach Ablauf eines Beobachtungszeitraums mit zuvor festgelegten Kriterien ohne Erfolg
- Fortschreitendes Multiorganversagen
